# Supplementary material for: Water droplet bouncing—a definition for superhydrophobic surfaces
Source: Royal Society of Chemistry journal article supplement (doi:10.1039/c1cc14749h), 2011-01-01
Supplement: c1cc14749h.pdf [file c1cc14749h.pdf]

The following data details the bouncing of water droplets on various surfaces, 8µL droplets were dropped from a height of 20 mm (dispensing tip to surface).

\*'Surface average' data provides water contact angle and water bouncing averages on each surface type (10 spots for each surface), 'spot testing' uses water droplets bouncing on a point with known water contact angle)

| Surface Averages |          |             |                                                                                |                 |
|------------------|----------|-------------|--------------------------------------------------------------------------------|-----------------|
| CA (°)           | $\sigma$ | No. Bounces | Material                                                                       | Roughness Type  |
| 5                | 1.2      | 0           | UV-Irradiated Titania                                                          | Flat            |
| 30               | 2        | 0           | Non-Irradiated Titania                                                         | Flat            |
| 45               | 2.7      | 0           | Glass                                                                          | Flat            |
| 71               | 3.3      | 0           | Heat Treated Glass                                                             | Flat            |
| 90               | 1.7      | 0           | Copper Metal                                                                   | Flat            |
| 95               | 1.5      | 0           | Flat Sylgard 184 Elastomer                                                     | Flat            |
| 99               | 1.6      | 0           | Flat Dyneon FC-2120 Fluoroelastomer                                            | Flat            |
| 110              | 2.1      | 0           | AACVD Coating of Dyneon FC-2120 Fluoroelastomer on Glass                       | Rounded         |
| 129              | 2.8      | 0           | AACVD Coating of Sylgard 184 Elastomer on Glass                                | Rounded         |
| 130              | 3        | 0           | AACVD Coating of Sylgard 184 Elastomer on Glass                                | Rounded         |
| 152              | 3.3      | 1.2         | AACVD Coating of Sylgard 184 Elastomer on Glass                                | Rounded         |
| 156              | 2.7      | 2.5         | AACVD Coating of Sylgard 184 Elastomer on Glass                                | Rounded         |
| 156              | 3.6      | 2.5         | AACVD Coating of Sylgard 184 Elastomer on Glass                                | Rounded         |
| 156              | 2.3      | 3           | AACVD Coating of Sylgard 184 Elastomer on Glass                                | Rounded         |
| 157              | 3.2      | 4           | AACVD Coating of Sylgard 184 Elastomer on Glass                                | Rounded         |
| 161              | 2.8      | 5           | AACVD Coating of Sylgard 184 Elastomer on Glass                                | Rounded         |
| 165              | 2.7      | 7           | AACVD Coating of Sylgard 184 Elastomer on Glass                                | Rounded         |
| 169              | 1        | 9           | AACVD Coating of Sylgard 184 Elastomer on Elastomer Substrate                  | Rounded         |
| 171              | 1.1      | 12          | Thiol-functionalised Copper Hydroxide Nanoneedles                              | Sharp (Needles) |
| 172              | 1.3      | 12          | Fluorinatedthiol-functionalised Copper Hydroxide Nanoneedles                   | Sharp (Needles) |
| 175              | 1.3      | 12          | Trimethylsiloxane Functionalised Silica Microparticles Deposited by Hybrid CVD | Rounded         |

| Spot Testing |             |                                                 |                |
|--------------|-------------|-------------------------------------------------|----------------|
| CA (°)       | No. Bounces | Material                                        | Roughness Type |
| 120.3        | 0           | AACVD Coating of Sylgard 184 Elastomer on Glass | Rounded        |
| 120.8        | 0           | AACVD Coating of Sylgard 184 Elastomer on Glass | Rounded        |
| 121.5        | 0           | AACVD Coating of Sylgard 184 Elastomer on Glass | Rounded        |
| 121.9        | 0           | AACVD Coating of Sylgard 184 Elastomer on Glass | Rounded        |
| 123.2        | 0           | AACVD Coating of Sylgard 184 Elastomer on Glass | Rounded        |
| 123.3        | 0           | AACVD Coating of Sylgard 184 Elastomer on Glass | Rounded        |
| 125.7        | 0           | AACVD Coating of Sylgard 184 Elastomer on Glass | Rounded        |
| 127.3        | 0           | AACVD Coating of Sylgard 184 Elastomer on Glass | Rounded        |
| 127.4        | 0           | AACVD Coating of Sylgard 184 Elastomer on Glass | Rounded        |
| 127.6        | 0           | AACVD Coating of Sylgard 184 Elastomer on Glass | Rounded        |
| 128.8        | 0           | AACVD Coating of Sylgard 184 Elastomer on Glass | Rounded        |
| 128.8        | 0           | AACVD Coating of Sylgard 184 Elastomer on Glass | Rounded        |
| 130.7        | 0           | AACVD Coating of Sylgard 184 Elastomer on Glass | Rounded        |
| 132.4        | 0           | AACVD Coating of Sylgard 184 Elastomer on Glass | Rounded        |
| 132.6        | 0           | AACVD Coating of Sylgard 184 Elastomer on Glass | Rounded        |
| 133.6        | 0           | AACVD Coating of Sylgard 184 Elastomer on Glass | Rounded        |
| 134.7        | 0           | AACVD Coating of Sylgard 184 Elastomer on Glass | Rounded        |
| 140.2        | 0           | AACVD Coating of Sylgard 184 Elastomer on Glass | Rounded        |
| 142.0        | 0           | AACVD Coating of Sylgard 184 Elastomer on Glass | Rounded        |
| 142.3        | 0           | AACVD Coating of Sylgard 184 Elastomer on Glass | Rounded        |
| 144.0        | 0           | AACVD Coating of Sylgard 184 Elastomer on Glass | Rounded        |
| 147.4        | 0           | AACVD Coating of Sylgard 184 Elastomer on Glass | Rounded        |
| 148.5        | 0           | AACVD Coating of Sylgard 184 Elastomer on Glass | Rounded        |
| 149.6        | 0           | AACVD Coating of Sylgard 184 Elastomer on Glass | Rounded        |
| 149.7        | 0           | AACVD Coating of Sylgard 184 Elastomer on Glass | Rounded        |
| 150.4        | 0           | AACVD Coating of Sylgard 184 Elastomer on Glass | Rounded        |
| 150.8        | 0           | AACVD Coating of Sylgard 184 Elastomer on Glass | Rounded        |
| 151.1        | 1           | AACVD Coating of Sylgard 184 Elastomer on Glass | Rounded        |
| 151.2        | 0           | AACVD Coating of Sylgard 184 Elastomer on Glass | Rounded        |
| 151.3        | 1           | AACVD Coating of Sylgard 184 Elastomer on Glass | Rounded        |
| 151.4        | 1           | AACVD Coating of Sylgard 184 Elastomer on Glass | Rounded        |
| 151.4        | 1           | AACVD Coating of Sylgard 184 Elastomer on Glass | Rounded        |
| 151.4        | 1           | AACVD Coating of Sylgard 184 Elastomer on Glass | Rounded        |
| 151.4        | 1           | AACVD Coating of Sylgard 184 Elastomer on Glass | Rounded        |
| 151.6        | 1           | AACVD Coating of Sylgard 184 Elastomer on Glass | Rounded        |
| 151.7        | 1           | AACVD Coating of Sylgard 184 Elastomer on Glass | Rounded        |
| 151.7        | 1           | AACVD Coating of Sylgard 184 Elastomer on Glass | Rounded        |
| 151.7        | 1           | AACVD Coating of Sylgard 184 Elastomer on Glass | Rounded        |
| 151.8        | 1           | AACVD Coating of Sylgard 184 Elastomer on Glass | Rounded        |
| 151.8        | 1           | AACVD Coating of Sylgard 184 Elastomer on Glass | Rounded        |
| 151.9        | 1           | AACVD Coating of Sylgard 184 Elastomer on Glass | Rounded        |
| 151.9        | 0           | AACVD Coating of Sylgard 184 Elastomer on Glass | Rounded        |
| 151.9        | 1           | AACVD Coating of Sylgard 184 Elastomer on Glass | Rounded        |
| 152.0        | 1           | AACVD Coating of Sylgard 184 Elastomer on Glass | Rounded        |
| 152.1        | 0           | AACVD Coating of Sylgard 184 Elastomer on Glass | Rounded        |
| 152.1        | 1           | AACVD Coating of Sylgard 184 Elastomer on Glass | Rounded        |
| 152.1        | 1           | AACVD Coating of Sylgard 184 Elastomer on Glass | Rounded        |
| 152.2        | 1           | AACVD Coating of Sylgard 184 Elastomer on Glass | Rounded        |
| 152.3        | 1           | AACVD Coating of Sylgard 184 Elastomer on Glass | Rounded        |
| 152.4        | 0           | AACVD Coating of Sylgard 184 Elastomer on Glass | Rounded        |
| 152.5        | 1           | AACVD Coating of Sylgard 184 Elastomer on Glass | Rounded        |

|       |   |                                                 |         |
|-------|---|-------------------------------------------------|---------|
| 152.8 | 0 | AACVD Coating of Sylgard 184 Elastomer on Glass | Rounded |
| 152.8 | 2 | AACVD Coating of Sylgard 184 Elastomer on Glass | Rounded |
| 153.0 | 2 | AACVD Coating of Sylgard 184 Elastomer on Glass | Rounded |
| 153.1 | 0 | AACVD Coating of Sylgard 184 Elastomer on Glass | Rounded |
| 153.2 | 0 | AACVD Coating of Sylgard 184 Elastomer on Glass | Rounded |
| 153.3 | 2 | AACVD Coating of Sylgard 184 Elastomer on Glass | Rounded |
| 153.4 | 1 | AACVD Coating of Sylgard 184 Elastomer on Glass | Rounded |
| 153.7 | 2 | AACVD Coating of Sylgard 184 Elastomer on Glass | Rounded |
| 153.8 | 2 | AACVD Coating of Sylgard 184 Elastomer on Glass | Rounded |
| 153.8 | 2 | AACVD Coating of Sylgard 184 Elastomer on Glass | Rounded |
| 153.9 | 2 | AACVD Coating of Sylgard 184 Elastomer on Glass | Rounded |
| 153.9 | 2 | AACVD Coating of Sylgard 184 Elastomer on Glass | Rounded |
| 154.0 | 2 | AACVD Coating of Sylgard 184 Elastomer on Glass | Rounded |
| 154.6 | 1 | AACVD Coating of Sylgard 184 Elastomer on Glass | Rounded |
| 154.7 | 1 | AACVD Coating of Sylgard 184 Elastomer on Glass | Rounded |
| 155.2 | 1 | AACVD Coating of Sylgard 184 Elastomer on Glass | Rounded |
| 155.8 | 2 | AACVD Coating of Sylgard 184 Elastomer on Glass | Rounded |
| 156.0 | 3 | AACVD Coating of Sylgard 184 Elastomer on Glass | Rounded |
| 156.2 | 4 | AACVD Coating of Sylgard 184 Elastomer on Glass | Rounded |
| 156.3 | 5 | AACVD Coating of Sylgard 184 Elastomer on Glass | Rounded |
| 156.7 | 4 | AACVD Coating of Sylgard 184 Elastomer on Glass | Rounded |

#### PTFE - Spot Testing

| CA (°) | No. Bounces | Material                                       | Roughness Type |
|--------|-------------|------------------------------------------------|----------------|
| 105    | 0           | Flat Polytetrafluoroethylene Substrate         | Flat           |
| 125.4  | 0           | Mechanically Roughened Polytetrafluoroethylene | Sharp          |
| 128.3  | 0           | Mechanically Roughened Polytetrafluoroethylene | Sharp          |
| 139.6  | 0           | Mechanically Roughened Polytetrafluoroethylene | Sharp          |
| 143.2  | 0           | Mechanically Roughened Polytetrafluoroethylene | Sharp          |
| 146.8  | 0           | Mechanically Roughened Polytetrafluoroethylene | Sharp          |
| 149.7  | 0           | Mechanically Roughened Polytetrafluoroethylene | Sharp          |
| 151.4  | 0           | Mechanically Roughened Polytetrafluoroethylene | Sharp          |
| 152.2  | 0           | Mechanically Roughened Polytetrafluoroethylene | Sharp          |
| 153.1  | 0           | Mechanically Roughened Polytetrafluoroethylene | Sharp          |
| 153.1  | 0           | Mechanically Roughened Polytetrafluoroethylene | Sharp          |
| 154.3  | 0           | Mechanically Roughened Polytetrafluoroethylene | Sharp          |
| 155.7  | 0           | Mechanically Roughened Polytetrafluoroethylene | Sharp          |
| 156    | 0           | Mechanically Roughened Polytetrafluoroethylene | Sharp          |
| 156.4  | 1           | Mechanically Roughened Polytetrafluoroethylene | Sharp          |
| 157    | 1           | Mechanically Roughened Polytetrafluoroethylene | Sharp          |
| 157.1  | 2           | Mechanically Roughened Polytetrafluoroethylene | Sharp          |
| 157.4  | 1           | Mechanically Roughened Polytetrafluoroethylene | Sharp          |
| 157.9  | 2           | Mechanically Roughened Polytetrafluoroethylene | Sharp          |
| 158.3  | 2           | Mechanically Roughened Polytetrafluoroethylene | Sharp          |
